# Supplementary material for: A survey of the knowledge and practices of nursing students of Mbarara University of Science and Technology around Monitoring Fluid Requirements for burns patients on surgical ward at Mbarara Regional Referral Hospital.
Source: Research Square preprint supplement (doi:10.21203/rs.3.rs-1298862/v1), 2022-01-26
Supplement: Supplementary file 1 [file 81c1127dc568762daca0c448.pdf]

**Distribution of students regarding their knowledge about fluids for burns patients.**

| Students' Knowledge                                                        | Correct answer |             | Incorrect answer |             |
|----------------------------------------------------------------------------|----------------|-------------|------------------|-------------|
|                                                                            | Freq.          | Percent (%) | Freq.            | Percent (%) |
| The normal range (%) of body fluids in adults                              | 27             | 72.97       | 10               | 27.03       |
| The meaning of fluid balance in body                                       | 21             | 56.76       | 16               | 43.24       |
| If body systems should be monitored to assess the fluid balance            | 33             | 89.19       | 4                | 10.81       |
| The nurse's role in assessing the urinary system of a burns patient        | 37             | 100         | -                | -           |
| The nurse's role in assessing the cardiovascular system of a burns patient | 9              | 24.32       | 28               | 75.68       |
| the meaning of fluids replacement                                          | 24             | 64.86       | 13               | 35.14       |
| The basic steps in fluid replacement process                               | 5              | 13.51       | 32               | 86.49       |
| Importance of fluid replacement in burns patients during the initial phase | 11             | 29.73       | 26               | 70.27       |
| Stating Parkland's formula used in                                         | 6              | 16.22       | 31               | 83.78       |

|                                                                                                                            |    |       |    |       |
|----------------------------------------------------------------------------------------------------------------------------|----|-------|----|-------|
| fluid replacement.                                                                                                         |    |       |    |       |
| Amount of fluid using the Parkland formul to be given to a patient weighing 30kg in the resuscitative phase, with 28% TBSA | 18 | 48.65 | 19 | 51.35 |
