# Supplementary material for: A survey of the knowledge and practices of nursing students of Mbarara University of Science and Technology around Monitoring Fluid Requirements for burns patients on surgical ward at Mbarara Regional Referral Hospital.
Source: Research Square preprint supplement (doi:10.21203/rs.3.rs-1298862/v1), 2022-01-26
Supplement: Supplementary file 2 [file b0a4d3304127a95c35852035.pdf]

### Characteristics of study participants

| <i>Socio-demographics</i>     | <i>Freq.</i> | <i>Percent (%)</i> | <i>Mean</i> | <i>SD</i> |
|-------------------------------|--------------|--------------------|-------------|-----------|
| <b><i>Age</i></b>             |              |                    |             |           |
| <i>20-24</i>                  | 17           | 45.95              |             |           |
| <i>25-29</i>                  | 4            | 10.81              |             |           |
| <i>30-34</i>                  | 9            | 24.32              |             |           |
| <i>35-39</i>                  | 4            | 10.81              |             |           |
| <i>40-44</i>                  | 2            | 5.41               |             |           |
| <i>44+</i>                    | 1            | 2.70               |             |           |
| <b><i>Gender</i></b>          |              |                    |             |           |
| <i>Female</i>                 | 21           | 56.76              |             |           |
| <i>Male</i>                   | 16           | 43.24              |             |           |
| <b><i>Religion</i></b>        |              |                    |             |           |
| <i>Roman catholic</i>         | 19           | 51.35              |             |           |
| <i>Anglican</i>               | 10           | 27.03              |             |           |
| <i>Muslim</i>                 | 1            | 2.70               |             |           |
| <i>Orthodox</i>               | 0            | 0                  |             |           |
| <i>Pentecostal</i>            | 4            | 10.81              |             |           |
| <i>Traditional</i>            | 0            | 0                  |             |           |
| <i>None</i>                   | 3            | 8.11               |             |           |
| <b><i>Program</i></b>         |              |                    |             |           |
| <i>BNC</i>                    | 19           | 51.35              |             |           |
| <i>BNS</i>                    | 18           | 48.65              |             |           |
| <b><i>Year of study</i></b>   |              |                    | 2.73        | ± 0.99    |
| <i>1</i>                      | 3            | 8.11               |             |           |
| <i>2</i>                      | 15           | 40.54              |             |           |
| <i>3</i>                      | 8            | 21.62              |             |           |
| <i>4</i>                      | 11           | 29.73              |             |           |
| <b><i>Tuition funding</i></b> |              |                    |             |           |

|                                                                                         |    |       |            |
|-----------------------------------------------------------------------------------------|----|-------|------------|
| <i>Government-funded</i>                                                                | 3  | 8.11  |            |
| <i>NGO-funded</i>                                                                       | 4  | 10.81 |            |
| <i>Private funded</i>                                                                   | 14 | 37.84 |            |
| <i>Self-funded</i>                                                                      | 16 | 43.24 |            |
| <b><i>Marital status</i></b>                                                            |    |       |            |
| <i>Single</i>                                                                           | 24 | 64.86 |            |
| <i>Married</i>                                                                          | 13 | 35.14 |            |
| <b><i>Semesters rotated on surgical ward</i></b>                                        |    | 1.95  | $\pm 0.85$ |
| <i>1</i>                                                                                | 14 | 37.84 |            |
| <i>2</i>                                                                                | 11 | 29.73 |            |
| <i>3</i>                                                                                | 12 | 32.43 |            |
| <b><i>Previous training on fluids and electrolytes follow-up for burns patients</i></b> |    |       |            |
| <i>Yes</i>                                                                              | 20 | 45.95 |            |
| <i>No</i>                                                                               | 17 | 54.05 |            |
