# Supplementary material for: A survey of the knowledge and practices of nursing students of Mbarara University of Science and Technology around Monitoring Fluid Requirements for burns patients on surgical ward at Mbarara Regional Referral Hospital.
Source: Research Square preprint supplement (doi:10.21203/rs.3.rs-1298862/v1), 2022-01-26
Supplement: Supplementary file 3 [file e21235921013bd25d745fa12.pdf]

**Distribution of students regarding their Practices towards monitoring of fluids in burned patients within the first 24-72 hours of admission.**

| Students' practices                                                  | Done  |             | Not done |             |
|----------------------------------------------------------------------|-------|-------------|----------|-------------|
|                                                                      | Freq. | Percent (%) | Freq.    | Percent (%) |
| Performing hand hygiene                                              | 37    | 100         | -        | -           |
| Checking to see if IV line flows freely                              | 35    | 94.59       | 2        | 5.41        |
| Assessing patients using rule of nines.                              | 26    | 70.27       | 11       | 29.73       |
| Calculating fluids using parklands formula                           | 23    | 62.16       | 14       | 37.84       |
| Check the infusion rate \date.                                       | 32    | 86.49       | 5        | 13.51       |
| Document the prescribed fluid on the patients chart.                 | 34    | 91.89       | 3        | 8.11        |
| Check if inflammation signs show.                                    | 26    | 70.27       | 11       | 29.73       |
| Record the time when the administration of fluid starts              | 31    | 83.78       | 6        | 16.22       |
| Mentioning the amount of fluid infused and documenting the additives | 26    | 70.27       | 11       | 29.73       |

|                                                            |    |       |   |      |
|------------------------------------------------------------|----|-------|---|------|
| that were added to the fluid                               |    |       |   |      |
| Record date and your signature after administering fluids. | 34 | 91.89 | 3 | 8.11 |
